# Supplementary material for: Development of a solvent sustainability guide for the paints and coatings industry
Source: Royal Society of Chemistry journal article supplement (doi:10.1039/d4gc01962h), 2024-01-01
Supplement: d4gc01962h1.zip [file d4gc01962h1.zip]

## Sheet: Sheet1
POCP [100 kg C2H4-eq]	SPCP (ppb pollutant/ppb VOC)	labelled chemicals in this column are the outliers in the graph
44.6	0.014
44.6	0.016
48	0.02
54.3	0.023
40	0.024
30	0.026
46.8	0.014
17	0.007
51.1	0.019
9.4	0.001
21.8	0.005
24.1	0.012
29.9	0.011
37.3	0.076	MEK
2.5	0.001
38.6	0.012
21.3	0.011
19.9	0.01
38.2	0.017
39.2	0.02
21.3	0.015
13.1	0.002
4.6	0.002
4.6	0.01
37.3	0.008
49	0.075	MIBK
29	0.012
101	0.07
12.3	0.004
6.5	0.003
63.7	0.028
2.5	0.001
2.5	0.001
41	0.08	o-xylene
78	0.116	m-xylene
59.3	0.036
63	0.159	trimethyl benzene
36.9	0.05	1-methoxypropanol
35.7	0.024
